# Supplementary material for: Synchronous enantiomeric enrichment of both reactant and product by absolute asymmetric synthesis using circularly polarized light. Part 1. Theoretical and experimental verification of the asymmetric photoisomerization of methyl norbornadiene-2-carboxylate to methyl quadricyclane-1-carboxylate†
Source: Royal Society of Chemistry journal article supplement (doi:10.1039/b100751n), 2001-01-01
Supplement: b100751n.pdf [file b100751n.pdf]

## Supplementary data

**TSynchronous enantiomeric enrichment of reactant and product by absolute asymmetric synthesis using circular polarized light. 1.1 Theoretical and experimental verification of the asymmetric photoisomerization of methyl norbornadiene-2-carboxylate to methyl quadricyclane-2-carboxylate**

**Hideo Nishino, Asao Nakamura and Yoshihisa Inoue\***

*Inoue Photochirogenesis Project, ERATO, JST, 4-6-3 Kamishinden, Toyonaka 560-0085, Japan*

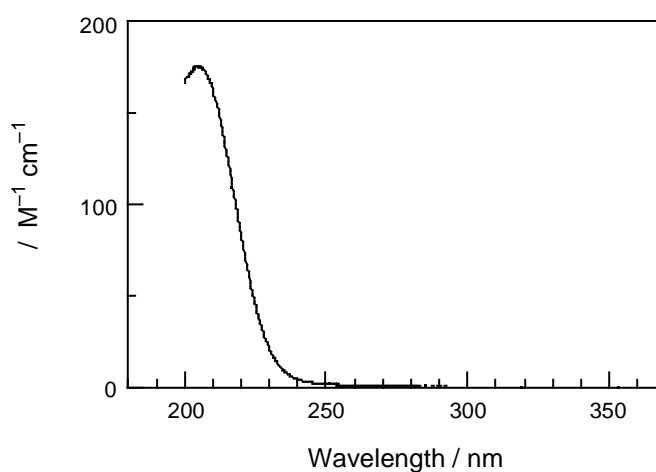

**Fig.** UV spectrum of methyl cyclopropanecarboxylate (**MCB**) in acetonitrile.
